# Supplementary material for: Personality Computing With Naturalistic Music Listening Behavior: Comparing Audio and Lyrics Preferences
Source: Oxford University Press journal article supplement (doi:10.1525/collabra.75214), 2023-01-01
Supplement: collabra_2023_9_1_75214_161924.pdf [file collabra_2023_9_1_75214_161924.pdf]

Table S1

*Description of Datasets Used in the Current Study*

| Data set   | <i>N</i>  | Collection period | Logging days | % Music days | Music events | % Music events with lyrics | Reference             |
|------------|-----------|-------------------|--------------|--------------|--------------|----------------------------|-----------------------|
| Study 1    | 67 (137)  | 09/2014 - 08/2015 | 47 - 60      | 43.64 %      | 30654        | 38.33 %                    | Stachl et al., 2017   |
| Study 2    | 105 (251) | 08/2016 - 08/2017 | 22 - 38      | 50.03 %      | 24582        | 44.57 %                    | Schuwerk et al., 2019 |
| Study 3    | 158 (296) | 10/2017 - 01/2018 | 3 - 85       | 46.55 %      | 75970        | 42.31 %                    | Schoedel et al., 2019 |
| This study | 330       | 09/2014 - 01/2018 | 3 - 85       | 47.06 %      | 131206       | 42.22 %                    |                       |

*Note.* *N* indicates the size of the sample from the respective study after the application of our inclusion criteria. The total sample size per study (based on combined availability of logging and self-report data) is given in parentheses. Logging days indicate the minimum and the maximum number of days with smartphone sensing data within the study sample. % Music days indicates the sample's average percentage of study days where music listening occurred on the smartphone out of all logging days. Music events indicate the total amount of logged music listening activities that lasted longer than 20 seconds (i.e., unskipped music events) across all participants and study days. % Music events with lyrics indicate the percentage of all music events that could be matched with external lyrics data.
