# Supplementary material for: Personality Computing With Naturalistic Music Listening Behavior: Comparing Audio and Lyrics Preferences
Source: Oxford University Press journal article supplement (doi:10.1525/collabra.75214), 2023-01-01
Supplement: collabra_2023_9_1_75214_161926.pdf [file collabra_2023_9_1_75214_161926.pdf]

Table S3

*Tuning Results for Different Model Specifications in the Latent Dirichlet Allocation*

| Number of topics | Alpha | Beta | Number of iterations | Optimization interval | Topic coherence | Training time |
|------------------|-------|------|----------------------|-----------------------|-----------------|---------------|
| 15               | 0.01  | 0.01 | 1000                 | OFF                   | -1.675          | 09 min 19 sec |
| 15               | -     | 0.03 | 1000                 | ON-100                | -2.410          | 11 min 12 sec |
| 30               | 0.01  | 0.01 | 1000                 | OFF                   | -1.661*         | 15 min 33 sec |
| 30               | -     | 0.02 | 1000                 | ON-100                | -2.707          | 09 min 00 sec |
| 50               | 0.01  | 0.01 | 1000                 | OFF                   | -1.691          | 21 min 00 sec |
| 50               | -     | 0.01 | 1000                 | ON-100                | -2.934          | 09 min 46 sec |
| 60               | 0.01  | 0.01 | 1000                 | OFF                   | -1.702          | 19 min 31 sec |
| 60               | -     | 0.01 | 1000                 | ON-100                | -3.017          | 09 min 58 sec |
| 75               | 0.01  | 0.01 | 1000                 | OFF                   | -1.689          | 29 min 40 sec |
| 75               | -     | 0.01 | 1000                 | ON-100                | -3.084          | 21 min 57 sec |
| 120              | 0.01  | 0.01 | 1000                 | OFF                   | -1.738          | 31 min 16 sec |
| 120              | -     | 0.01 | 1000                 | ON-100                | -3.309          | 20 min 13 sec |

*Note:* The prior alpha governs whether the documents in LDA contain an exclusive (smaller values) or broad (larger values) range of topics. The prior beta determines whether the words in LDA belong to many (larger values) or only a few topics (smaller values). For the models with optimization “ON”, the prior alpha was optimized for each topic separately. Hence the absence of an overall alpha value for the respective models. The number of iterations determines how many iterations the LDA uses to find the optimal topic-document and word-topic distributions, whereby 1000 iterations are the default value. The optimization interval sets the length of the search interval of hyperparameter optimization. It was set to 100 for all models. Models without hyperparameter optimization have no corresponding value.

\* The lowest coherence score is marked by an asterisk.
