# Supplementary material for: Personality Computing With Naturalistic Music Listening Behavior: Comparing Audio and Lyrics Preferences
Source: Oxford University Press journal article supplement (doi:10.1525/collabra.75214), 2023-01-01
Supplement: collabra_2023_9_1_75214_161927.pdf [file collabra_2023_9_1_75214_161927.pdf]

Table S4

*Top 20 Highest-Frequency Words per Topic in the Latent Dirichlet Allocation Model*

| Topic | Top 20 Words                                                                                                                                      |
|-------|---------------------------------------------------------------------------------------------------------------------------------------------------|
| 0     | love, heart, baby, fall, dream, always, hold, believe, find, long, everything, leave, cry, wait, nothing, tonight, alone, stay, something, change |
| 1     | kill, die, lie, nothing, man, people, head, fight, god, end, f*ck, hate, face, everything, believe, stand, dead, change, inside, war              |
| 2     | F*ck, man, sh*t, people, n*gga, money, hate, die, put, rock, head, stop, run, kill, talk, face, god, street, gun, start                           |
| 3     | god, soul, die, burn, blood, lord, death, heart, light, lie, fire, dark, end, love, fear, man, dead, fall, pain, word                             |
| 4     | love, baby, heart, long, home, dream, happy, hold, sing, cry, little, find, always, believe, light, wait, everything, song, remember, shine       |
| 5     | christmas, man, lyrics, shake, good, baby, boy, girl, love, little, run, home, town, gal, rock, play, sing, dance, ride, fun                      |
| 6     | love, baby, good, girl, little, man, nobody, dance, talk, woman, move, everybody, blue, home, work, boy, walk, shake, long, really                |
| 7     | love, heart, dream, cry, home, find, long, wait, leave, always, hold, baby, good, alone, fall, tonight, lonely, light, stay, shine                |
| 8     | love, heart, song, sing, friend, little, long, always, word, hold, dream, nothing, hear, find, home, something, fall, wait, alone, walk           |
| 9     | love, home, walk, man, run, little, long, head, dream, find, light, heart, leave, always, friend, town, sun, place, people, nothing               |
| 10    | n*gga, sh*t, man, f*ck, rock, stop, b*tch, boy, put, hit, big, money, y'all, girl, baby, ass, real, beat, show, n*ggaz                            |
| 11    | light, heart, love, fall, dream, burn, soul, dark, god, die, sun, fire, sky, face, end, inside, pain, lie, hear, wait                             |
| 12    | love, baby, heart, girl, believe, hold, cry, good, find, always, true, long, little, stay, someone, really, hurt, please, somebody, thing         |
| 13    | baby, love, girl, little, good, boy, tonight, hot, man, crazy, rock, ready, everybody, dance, talk, alright, body, really, stop, show             |
| 14    | love, nothing, always, believe, heart, find, dream, something, change, wait, alone, walk, leave, fall, inside, lost, hold, everything, left, end  |
| 15    | love, everything, heart, long, find, dream, wait, change, fall, run, leave, nothing, always, good, baby, something, walk, believe, move, alone    |
| 16    | n*gga, f*ck, sh*t, b*tch, man, n*ggaz, y'all, ass, money, hit, put, real, game, big, h*e, f*ckin, check, street, head, boy                        |
| 17    | love, god, heart, dream, die, lord, soul, dead, death, blood, light, burn, fall, end, dark, lie, fire, save, stand, fear                          |
| 18    | love, baby, girl, dance, tonight, good, heart, little, stop, really, shake, boy, hold, move, kiss, true, lover, real, sweet, stay                 |
| 19    | baby, love, little, girl, rock, man, roll, boom, home, good, dance, long, stop, heart, boy, play, bye, tonight, talk, touch                       |
| 20    | head, run, dead, man, die, face, light, heart, dream, fall, end, love, sky, inside, lie, burn, walk, leave, watch, black                          |

Table S3 (continued)

| Topic | Top 20 Words                                                                                                                                  |
|-------|-----------------------------------------------------------------------------------------------------------------------------------------------|
| 21    | love, baby, girl, good, alright, little, tonight, wait, please, heart, long, home, everything, mine, really, man, dance, boy, stay, hold      |
| 22    | love, run, find, nothing, wait, heart, lie, inside, leave, fall, change, hold, long, everything, something, always, end, face, believe        |
| 23    | love, heart, fall, light, dream, find, wait, inside, hold, nothing, end, leave, face, breath, die, believe, lie, alone, rain, run             |
| 24    | love, home, little, man, long, ride, sing, song, good, blue, play, light, rock, girl, roll, boy, town, hear, sun, music                       |
| 25    | man, girl, big, boy, rock, n*gga, sh*t, f*ck, put, ride, roll, head, good, baby, hit, money, play, party, little, people                      |
| 26    | love, heart, baby, always, hold, find, something, believe, leave, nothing, lie, wait, cry, dream, alone, girl, everything, break, wrong, fall |
| 27    | god, love, burn, heart, fire, soul, light, lord, die, heaven, dark, jesus, fall, man, holy, blood, sky, dream, beautiful, angel               |
| 28    | man, dead, head, f*ck, little, kill, die, people, boy, hell, blood, god, city, good, lyrics, black, face, big, love, play                     |
| 29    | man, money, people, f*ck, work, little, good, put, kid, play, run, love, friend, head, sh*t, hit, move, big, beat, boy                        |

*Note.* The 20 most frequent words for each topic of our lyrics-based LDA model. Words occurring in more than 60% of the topics' high-frequency words and meaningless fill words (e.g., "yeah") were removed for better interpretability. The word ranking is based on the word's relative frequency within a certain topic and goes from left (high) to right (low).
