# Supplementary material for: Personality Computing With Naturalistic Music Listening Behavior: Comparing Audio and Lyrics Preferences
Source: Oxford University Press journal article supplement (doi:10.1525/collabra.75214), 2023-01-01
Supplement: collabra_2023_9_1_75214_161928.pdf [file collabra_2023_9_1_75214_161928.pdf]

Table S5

*Mean Prediction Performance per Personality Dimension and Variable Group for Random Forest Models*

| Personality Dimension     | Full Predictor Set | Habitual Listening Behavior | Audio Characteristics | Lyrics Characteristics | Lyrics Emotionality | Lyrics Topics      | Lyrics Word Embeddings | Other Lyrics Characteristics |
|---------------------------|--------------------|-----------------------------|-----------------------|------------------------|---------------------|--------------------|------------------------|------------------------------|
| (O) Openness              | 0.24 [0.11,0.37]   | 0.05 [-0.06,0.16]           | 0.20 [0.09,0.31]      | 0.23 [0.10,0.36]       | 0.06 [-0.05,0.18]   | 0.17 [0.06,0.28]   | 0.23 [0.11,0.36]       | 0.17 [0.06,0.27]             |
| (O1) O. to imagination    | 0.24 [0.13,0.36]   | 0.04 [-0.08,0.16]           | 0.13 [0.02,0.25]      | 0.23 [0.12,0.35]       | 0.10 [0.00,0.20]    | 0.19 [0.07,0.30]   | 0.23 [0.11,0.34]       | 0.09 [-0.01,0.20]            |
| (O2) O. to aesthetics     | 0.20 [0.09,0.32]   | 0.12 [0.02,0.23]            | 0.26 [0.15,0.37]      | 0.19 [0.08,0.30]       | 0.05 [-0.06,0.15]   | 0.07 [-0.02,0.16]  | 0.19 [0.08,0.31]       | 0.16 [0.05,0.27]             |
| (O3) O. to feelings       | 0.23 [0.12,0.34]   | 0.07 [-0.03,0.17]           | 0.29 [0.19,0.39]      | 0.21 [0.11,0.32]       | 0.04 [-0.07,0.16]   | 0.14 [0.03,0.25]   | 0.21 [0.10,0.33]       | 0.09 [-0.03,0.21]            |
| (O4) O. to actions        | 0.03 [-0.08,0.14]  | 0.09 [-0.02,0.21]           | 0.05 [-0.06,0.16]     | 0.03 [-0.08,0.13]      | 0.04 [-0.08,0.15]   | 0.00 [-0.12,0.11]  | 0.03 [-0.08,0.13]      | 0.13 [0.02,0.25]             |
| (O5) O. to ideas          | 0.17 [0.05,0.29]   | -0.04 [-0.16,0.08]          | 0.09 [-0.02,0.20]     | 0.16 [0.05,0.28]       | 0.08 [-0.04,0.19]   | 0.16 [0.05,0.27]   | 0.16 [0.04,0.27]       | 0.24 [0.14,0.34]             |
| (O6) O. to value & norm   | 0.15 [0.04,0.26]   | 0.08 [-0.03,0.19]           | 0.15 [0.04,0.26]      | 0.15 [0.04,0.26]       | -0.03 [-0.15,0.08]  | 0.14 [0.04,0.24]   | 0.15 [0.04,0.26]       | 0.09 [-0.02,0.20]            |
| (C) Conscientiousness     | 0.12 [0.00,0.24]   | 0.06 [-0.05,0.17]           | 0.07 [-0.05,0.19]     | 0.12 [0.00,0.24]       | 0.03 [-0.10,0.15]   | 0.15 [0.03,0.27]   | 0.12 [0.00,0.24]       | 0.05 [-0.06,0.17]            |
| (C1) Competence           | 0.01 [-0.11,0.12]  | -0.01 [-0.12,0.10]          | 0.04 [-0.07,0.15]     | 0.01 [-0.10,0.13]      | -0.03 [-0.15,0.09]  | 0.09 [-0.03,0.20]  | 0.01 [-0.10,0.12]      | 0.03 [-0.08,0.14]            |
| (C2) Love of order        | 0.16 [0.04,0.27]   | 0.06 [-0.05,0.16]           | 0.17 [0.07,0.27]      | 0.16 [0.04,0.28]       | 0.02 [-0.09,0.13]   | 0.13 [0.02,0.24]   | 0.16 [0.04,0.27]       | 0.06 [-0.05,0.18]            |
| (C3) Sense of duty        | 0.10 [-0.01,0.21]  | 0.10 [-0.01,0.20]           | -0.04 [-0.15,0.07]    | 0.11 [0.00,0.22]       | -0.10 [-0.20,0.00]  | 0.16 [0.06,0.26]   | 0.11 [0.00,0.22]       | 0.02 [-0.10,0.13]            |
| (C4) Ambition             | 0.14 [0.01,0.27]   | 0.08 [-0.02,0.17]           | -0.03 [-0.13,0.08]    | 0.15 [0.02,0.27]       | 0.03 [-0.09,0.15]   | 0.10 [0.01,0.19]   | 0.14 [0.02,0.27]       | 0.11 [0.00,0.21]             |
| (C5) Discipline           | 0.04 [-0.07,0.14]  | 0.01 [-0.09,0.11]           | 0.01 [-0.11,0.12]     | 0.05 [-0.06,0.15]      | 0.09 [-0.02,0.20]   | 0.10 [-0.01,0.20]  | 0.04 [-0.06,0.15]      | 0.13 [0.03,0.22]             |
| (C6) Caution              | 0.05 [-0.05,0.16]  | 0.12 [0.02,0.21]            | 0.00 [-0.11,0.12]     | 0.06 [-0.05,0.17]      | 0.10 [-0.01,0.21]   | 0.08 [-0.04,0.19]  | 0.05 [-0.06,0.16]      | -0.01 [-0.14,0.11]           |
| (E) Extraversion          | 0.06 [-0.06,0.18]  | 0.06 [-0.06,0.18]           | 0.09 [-0.02,0.21]     | 0.06 [-0.06,0.18]      | 0.02 [-0.09,0.13]   | 0.10 [-0.02,0.22]  | 0.06 [-0.07,0.18]      | 0.12 [0.03,0.22]             |
| (E1) Friendliness         | 0.13 [0.00,0.25]   | 0.12 [0.02,0.23]            | 0.16 [0.05,0.27]      | 0.13 [0.00,0.26]       | 0.08 [-0.04,0.20]   | 0.07 [-0.04,0.19]  | 0.13 [0.01,0.26]       | 0.07 [-0.04,0.19]            |
| (E2) Sociableness         | 0.11 [0.00,0.22]   | 0.11 [0.00,0.22]            | 0.16 [0.04,0.28]      | 0.10 [-0.01,0.22]      | 0.03 [-0.08,0.15]   | 0.13 [0.03,0.24]   | 0.11 [0.00,0.22]       | 0.15 [0.03,0.27]             |
| (E3) Assertiveness        | 0.06 [-0.06,0.18]  | -0.11 [-0.22,0.00]          | -0.01 [-0.12,0.09]    | 0.07 [-0.05,0.20]      | -0.04 [-0.16,0.07]  | 0.10 [0.00,0.20]   | 0.05 [-0.06,0.17]      | 0.17 [0.07,0.28]             |
| (E4) Dynamism             | 0.08 [-0.03,0.19]  | -0.03 [-0.14,0.09]          | 0.04 [-0.08,0.17]     | 0.08 [-0.03,0.19]      | 0.05 [-0.06,0.16]   | 0.13 [0.02,0.24]   | 0.07 [-0.03,0.18]      | 0.15 [0.03,0.26]             |
| (E5) Adventurousness      | 0.05 [-0.07,0.17]  | 0.15 [0.04,0.26]            | 0.04 [-0.07,0.15]     | 0.05 [-0.07,0.17]      | 0.00 [-0.12,0.12]   | 0.10 [0.00,0.21]   | 0.05 [-0.07,0.17]      | 0.09 [-0.03,0.21]            |
| (E6) Cheerfulness         | 0.01 [-0.12,0.15]  | -0.02 [-0.15,0.10]          | -0.07 [-0.18,0.04]    | 0.02 [-0.11,0.15]      | 0.01 [-0.09,0.11]   | -0.06 [-0.18,0.06] | 0.03 [-0.11,0.16]      | 0.07 [-0.03,0.17]            |
| (A) Agreeableness         | 0.04 [-0.07,0.15]  | 0.12 [-0.01,0.24]           | 0.09 [-0.02,0.20]     | 0.03 [-0.08,0.14]      | -0.03 [-0.14,0.07]  | 0.02 [-0.10,0.14]  | 0.03 [-0.08,0.15]      | 0.01 [-0.11,0.13]            |
| (A1) Willingness to trust | 0.11 [-0.01,0.24]  | 0.06 [-0.03,0.16]           | 0.08 [-0.04,0.20]     | 0.12 [-0.01,0.24]      | 0.14 [0.04,0.25]    | 0.10 [0.00,0.21]   | 0.10 [-0.02,0.23]      | 0.09 [-0.03,0.20]            |

Table S5 (continued)

| Personality Dimension    | Full Predictor Set | Habitual Listening Behavior | Audio Characteristics | Lyrics Characteristics | Lyrics Emotionality | Lyrics Topics      | Lyrics Word Embeddings | Other Lyrics Characteristics |
|--------------------------|--------------------|-----------------------------|-----------------------|------------------------|---------------------|--------------------|------------------------|------------------------------|
| (A2) Genuineness         | 0.10 [-0.01,0.22]  | 0.14 [0.02,0.25]            | 0.18 [0.08,0.28]      | 0.09 [-0.02,0.21]      | 0.06 [-0.05,0.16]   | 0.09 [-0.03,0.20]  | 0.10 [-0.02,0.21]      | 0.10 [-0.01,0.21]            |
| (A3) Helpfulness         | -0.05 [-0.16,0.07] | 0.06 [-0.06,0.17]           | 0.02 [-0.10,0.13]     | -0.06 [-0.17,0.06]     | -0.02 [-0.14,0.09]  | -0.02 [-0.12,0.08] | -0.05 [-0.17,0.06]     | -0.06 [-0.18,0.05]           |
| (A4) Obligingness        | 0.00 [-0.12,0.11]  | 0.18 [0.07,0.29]            | 0.01 [-0.11,0.13]     | -0.04 [-0.17,0.08]     | -0.08 [-0.20,0.03]  | 0.01 [-0.12,0.14]  | -0.04 [-0.16,0.08]     | -0.08 [-0.20,0.03]           |
| (A5) Modesty             | -0.08 [-0.18,0.02] | 0.03 [-0.09,0.14]           | -0.03 [-0.15,0.09]    | -0.06 [-0.17,0.04]     | 0.00 [-0.11,0.11]   | -0.07 [-0.18,0.04] | -0.06 [-0.17,0.05]     | -0.05 [-0.17,0.08]           |
| (A6) Good naturedness    | 0.06 [-0.06,0.18]  | 0.09 [-0.02,0.21]           | 0.11 [-0.02,0.23]     | 0.05 [-0.07,0.16]      | 0.01 [-0.11,0.13]   | 0.03 [-0.07,0.14]  | 0.05 [-0.07,0.17]      | 0.08 [-0.04,0.20]            |
| (ES) Emotional Stability | -0.06 [-0.19,0.07] | 0.01 [-0.10,0.11]           | 0.04 [-0.07,0.15]     | -0.06 [-0.19,0.06]     | -0.08 [-0.20,0.04]  | -0.10 [-0.23,0.02] | -0.06 [-0.19,0.06]     | 0.12 [0.02,0.22]             |
| (ES1) Carefreeness       | 0.06 [-0.05,0.18]  | -0.02 [-0.12,0.08]          | 0.09 [-0.02,0.19]     | 0.05 [-0.07,0.17]      | -0.09 [-0.20,0.03]  | -0.08 [-0.18,0.03] | 0.06 [-0.07,0.18]      | 0.07 [-0.03,0.17]            |
| (ES2) Equanimity         | -0.01 [-0.10,0.08] | 0.08 [-0.04,0.19]           | 0.04 [-0.08,0.16]     | -0.01 [-0.11,0.08]     | 0.01 [-0.09,0.12]   | -0.07 [-0.18,0.04] | -0.01 [-0.10,0.08]     | 0.02 [-0.09,0.13]            |
| (ES3) Positive mood      | -0.03 [-0.13,0.07] | -0.06 [-0.18,0.05]          | -0.04 [-0.14,0.07]    | -0.03 [-0.13,0.07]     | -0.01 [-0.12,0.10]  | -0.06 [-0.17,0.04] | -0.02 [-0.12,0.09]     | 0.05 [-0.06,0.16]            |
| (ES4) Self consciousness | 0.08 [-0.05,0.20]  | 0.03 [-0.07,0.13]           | 0.02 [-0.08,0.13]     | 0.08 [-0.04,0.20]      | 0.01 [-0.09,0.11]   | 0.12 [0.02,0.22]   | 0.08 [-0.04,0.19]      | 0.09 [-0.02,0.20]            |
| (ES5) Self control       | -0.11 [-0.23,0.01] | 0.10 [-0.03,0.22]           | -0.13 [-0.24,-0.02]   | -0.10 [-0.22,0.02]     | -0.03 [-0.16,0.09]  | 0.05 [-0.07,0.17]  | -0.10 [-0.23,0.02]     | -0.03 [-0.14,0.08]           |
| (ES6) Emo. robustness    | -0.04 [-0.16,0.07] | -0.12 [-0.24,0.00]          | -0.06 [-0.17,0.04]    | -0.03 [-0.15,0.08]     | -0.07 [-0.17,0.04]  | -0.04 [-0.16,0.08] | -0.02 [-0.13,0.10]     | 0.15 [0.03,0.26]             |

*Note.* Prediction performance when using all music listening variables (i.e., the Full Predictor Set) vs. each group of variables separately for predicting personality scales. One benchmark was conducted for each personality outcome that was previously predicted with a minimum accuracy  $r_s \geq .10$  based on the full predictor set (see Table 2). The Spearman rank order correlation ( $r_s$ ) between predicted and measured personality scores was determined for each of the 100 resampling iterations of the cross-validation scheme (10x10 CV). This table provides means and 95% variance-corrected t-confidence intervals across iterations. Please note, that CIs are purely for descriptive purposes and that they do not consider multiple testing. The group of “Lyrics Characteristics” comprised the four lower-level groups of Lyrics’ Emotionality, Topics, Word Embeddings, and other Lyrics Characteristics (see Table 1).
