# Supplementary material for: Personality Computing With Naturalistic Music Listening Behavior: Comparing Audio and Lyrics Preferences
Source: Oxford University Press journal article supplement (doi:10.1525/collabra.75214), 2023-01-01
Supplement: collabra_2023_9_1_75214_161929.pdf [file collabra_2023_9_1_75214_161929.pdf]

Figure S1

*Selected Accumulated Local Effect Plots for Random Forest Models*

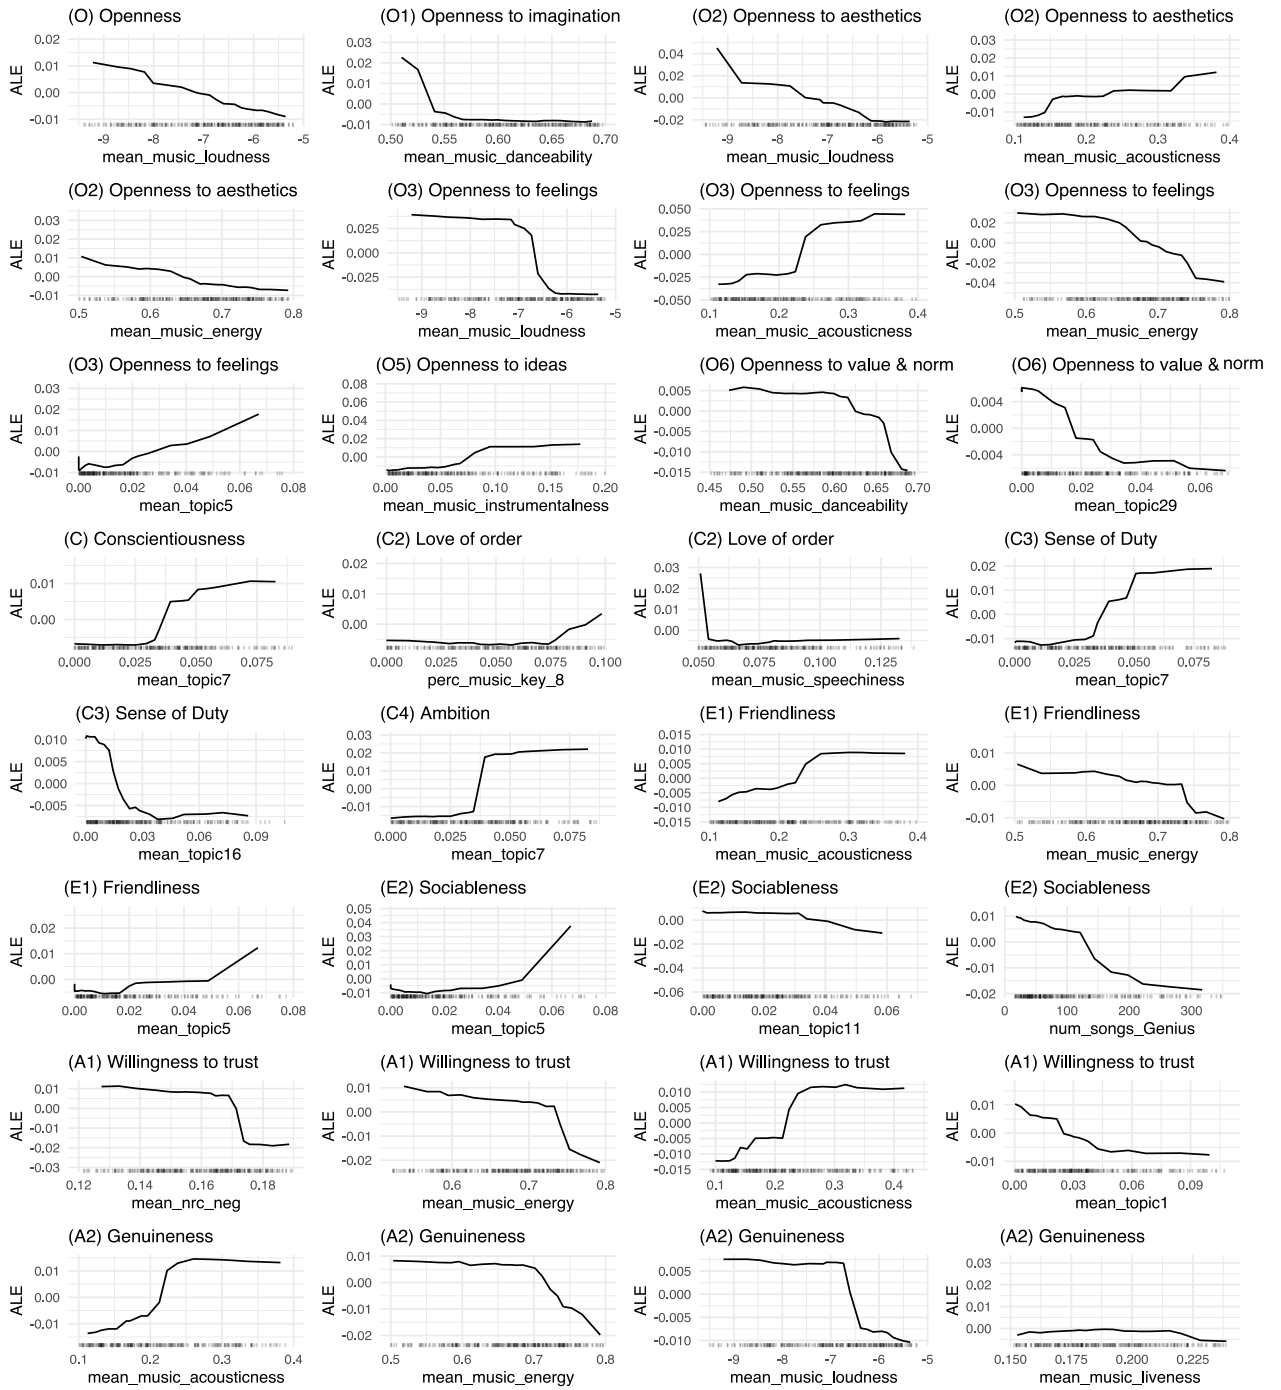

*Note.* Accumulated local effects (ALEs) for random forest models with a minimum prediction accuracy of  $r_s = .10$  (see Table 2). ALEs are presented for the 15 most important predictors (i.e., those with the highest permutation feature importance). Predictors based on the group of Lyrics' Word Embeddings are excluded as they are non-interpretable. ALE plots indicate how model predictions changed on average with regard to different values in local value-areas of the predictor. Values on the x-axis range between the 10<sup>th</sup> and 90<sup>th</sup> percentile of the respective variable's distribution and vertical stripes on the x-axis show the data distribution. ALE values are centered around zero. The audio characteristic loudness is measured in dB, while all other audio characteristics and lyrics topics and emotionality range between 0 and 1 (see Table 1). This Figure is available at, <https://osf.io/as3ze> under a CC-BY4.0 license.
